1 **The genetic and social contributions to sex differences in lifespan in *Drosophila serrata***

2

3 **Running title:** Sex differences in lifespan

4

5 Vikram P. Narayan<sup>1,2</sup>, Alastair J. Wilson<sup>2</sup>, Stephen F. Chenoweth<sup>1\*</sup>

6

7

8 1. The School of Biological Sciences, The University of Queensland, St. Lucia, Qld 4072,  
9 Australia

10

11 2. College of Life and Environmental Sciences, University of Exeter, Penryn, UK

12

13

14 Corresponding author: [s.chenoweth@uq.edu.au](mailto:s.chenoweth@uq.edu.au)

15

16 Word count: 2904

17 **Abstract**

18

19 Sex differences in lifespan remain an intriguing puzzle for evolutionary biologists. A possible  
20 explanation for lower lifespan in males is the unconditional expression of recessive deleterious  
21 alleles in heterogametic X chromosomes in males (the unguarded X hypothesis). Empirical  
22 evidence, however, has yielded controversial results that can be attributed to differences in both  
23 genetic and social background. Here, we test the unguarded X hypothesis in *Drosophila serrata*  
24 using a factorial design to quantify the effects of genotype, sex, social environment, and their  
25 interactions on phenotypic variation for lifespan. Using an experimental approach, we  
26 manipulated two inbred laboratory genotypes and their reciprocal F1s, while controlling for  
27 different levels of density and mating status to account for any potential social effects. Our  
28 results also show subtle but significant genotype dependent effects for both density and mating,  
29 but ultimately find the unguarded X hypothesis insufficient to fully explain sexual dimorphism  
30 in *D. serrata* lifespan.

31

32 **Keywords:** ageing, lifespan, *Drosophila*, sex, genetic, environment, unguarded X hypothesis

## 33 **Introduction**

34

35 The question of why males and females differ in lifespan has long fascinated evolutionary  
36 biologists. While exceptions exist, across many taxa it is most often females that live longer  
37 than males (Austad, 2019). Despite a long history of ageing research, no proven or unifying  
38 theories have emerged, and studies still yield contradictory results. Sexual dimorphism in  
39 lifespan can arise in response to sex differences in selection on life histories. Males and females  
40 maximise reproductive fitness in different ways (Friberg, 2005, Maklakov et al., 2009) with  
41 males typically investing more in early reproduction than females, even at the cost of their own  
42 somatic maintenance and lifespan (Maklakov and Lummaa, 2013). Selection therefore alters  
43 the overall costs of reproduction for each sex, and affects the evolution of ageing by shaping  
44 sex-specific mortality rates (Promislow 2003; Bonduriansky et al. 2008). Sexual dimorphism  
45 in lifespan may also be caused by asymmetric inheritance of uneven numbers of sex  
46 chromosomes between males and females. This hypothesis posits that for species where males  
47 are the hemizygous sex, harmful recessive mutations on the X chromosome will always be  
48 expressed in males whereas they will commonly be masked by dominance in females (Trivers,  
49 1985). A general prediction of this hypothesis coined the “unguarded X hypothesis” is that  
50 males should therefore on average have shorter lifespans than females.

51 Several studies have shown that variation in environmental or genetic background, can  
52 influence sexual dimorphism in lifespan (Kimber and Chippindale, 2013, Brengdahl et al.,  
53 2018b, Sultanova et al., 2018). Species of the genus *Drosophila* have featured prominently in  
54 aging research. In addition to *D. melanogaster* [see reviews by (Rogina, 2011) and (Piper and  
55 Partridge, 2018)], other species such as *D. simulans* (Ballard, 2005) have also been used as  
56 models for aging research. With the development of the *Drosophila serrata* Genome Reference  
57 Panel, a panel of re-sequenced lines (DsGRP) (Reddiex et al., 2018), *D. serrata* has now also  
58 emerged as a potential model for aging research. Here, we describe the results of a systematic  
59 analysis of lifespan comparisons in two highly inbred laboratory wild-type strains: DsGRP20  
60 and DsGRP57. Using inbred lines can provide insight into how the underlying genetic  
61 architecture of lifespan varies in response to genetic and social conditions. For instance,  
62 Swindell and Bouzat (2006) showed that stressful environments such as increased competition  
63 and temperature had pronounced effects on mitigating lifespan reducing effects of inbreeding  
64 depression in *D. melanogaster*. While the existence of inbreeding depression on lifespan are  
65 well documented, how heterozygous and homozygous genotypes respond to social (Carazo et

66 al., 2016, Sultanova et al., 2018, Brengdahl et al., 2018a) and environmental conditions (Tan  
67 et al., 2013, Brengdahl et al., 2018b, Sultanova and Carazo, 2019) such as mating and density  
68 is less well understood.

69 For *D. melanogaster*, the few studies where organismal condition was manipulated and lifespan  
70 was measured, both male- and female-biased effects on lifespan were found. This was true for  
71 genetic and environmental manipulations of condition. These studies highlight the importance  
72 of not just different genotypes, but also how sex differences in mating costs and behaviour  
73 affect survival rates (Burger and Promislow, 2004). This substantial variation in male and  
74 female responses emphasizes the importance of including not only both sexes, but also their  
75 social environment when analysing lifespan. Amongst the different social effects that have an  
76 impact on adult lifespan, mating activity and adult population density have been shown to  
77 influence longevity (Malick and Kidwell, 1966, Iliadi et al., 2009). In species of *Drosophila*,  
78 such as *D. virilis*, mating status significantly affected fly lifespan, with male and female virgins  
79 being affected very differently (Aigaki and Ohba, 1984). In *D. virillis* male sexual activity  
80 played the most important role amongst the complex interactions between both sexes. Mating  
81 status also affected the lifespan of both female and male *D. melanogaster* flies, though males  
82 were less affected (Koliada et al., 2020). The few systematic studies conducted on effects of  
83 high adult density, have found increased male sensitivity to variations in density, erratic  
84 mortality rates, and decreased mortality among higher density cohorts of middle-aged *D.*  
85 *melanogaster* females (Khazaeli et al., 1996).

86

87 This study aims to clarify how genetic background, sex, inbreeding, mating, and density act  
88 and interact with each other to shape lifespan in *Drosophila serrata*. In doing this we test the  
89 specific predictions of unguarded X and evaluate their sensitivity to genetic and social  
90 backgrounds. To quantify effects of genotype on lifespan we crossed fully inbred flies to  
91 generate outbred and reciprocal F1 flies (Vaiserman et al., 2013). To explore interactions with  
92 social contexts of mating (Aigaki and Ohba, 1984, Service, 1989, Zajitschek et al., 2013), we  
93 measured the lifespan of these flies as both virgins and non-virgins. Furthermore, we varied  
94 the population density of flies held together in a vial, as this is also known to affect lifespan  
95 and mortality rates (Graves and Mueller, 1993, Khazaeli et al., 1995, Khazaeli et al., 1996,  
96 Joshi and Mueller, 1997). This will ultimately bring us closer in our attempts to characterise  
97 sexual dimorphism in lifespan resulting from sex differences in selection as opposed to  
98 variation resulting from uneven numbers of sex chromosomes between males and females. We

99 present evidence of genetic interactions with sex and also with mating and density on survival  
100 characteristics in *D. serrata*.

101

## 102 **Materials and Methods**

103

### 104 **Fly stocks and culturing conditions**

105 All analyses were carried out using fruit fly genotypes, DsGRP20 and DsGRP57, randomly  
106 chosen from the DsGRP (Reddiex et al., 2018). Flies were maintained in vials containing agar-  
107 sugar-yeast medium, in a temperature-controlled room at 25°C and a 12/12 h light/dark cycle.  
108 We then performed density-controlled crosses between the two lines to produce inbred  
109 (DsGRP20♂ × DsGRP20♀ and DsGRP57♂ × DsGRP57♀), and outbred reciprocal crosses  
110 (DsGRP20♂ × DsGRP57♀, and DsGRP57♂ × DsGRP20♀) from here on referred to as  
111 genotypes. All experimental flies were collected as virgins within 6h after eclosion, and male  
112 and female offspring from each cross were randomly allocated into the experimental treatments  
113 in a factorial design including the effects of mating, and density. Flies in the mated treatment  
114 were allowed to mate for 2 days, collected using CO<sub>2</sub>, sorted by sex, and transferred to  
115 experimental vials for the lifespan trial. For each cross, virgin and mated treatments were  
116 maintained at three different vial densities. Vial densities were 5, 10 and 15 flies per vial (10  
117 replicate vials per variant, per sex).

118

### 119 **Lifespan assay**

120 Vials were randomized and flies tipped into fresh food vials without anesthesia every 3-4 days.  
121 On these occasions, dead flies were counted and removed to prevent them from being tipped  
122 into the fresh food vials. Survivorship was scored at the time of tipping until all flies had died.  
123 Flies that escaped while tipping were censored. Thus, for each specific combination of  
124 genotype, sex, mating, and density the minimum number of flies was 50 and the total number  
125 of flies was 4800 before censoring. This factorial design enables us to quantify the effects of  
126 genotype, sex, social environment, and their interactions on phenotypic variation for lifespan.

127

### 128 **Statistical analyses**

129 To compare the effects of sex, genotype, mating, and density on adult lifespan, we used a mixed  
130 model analysis of variance using restricted maximum likelihood (REML) estimates of the  
131 variance components (PROC GLIMMIX in SAS 9.2). Sex, DsGRP genotypes (DsGRP20♂ ×

132 DsGRP20 ♀, DsGRP57 ♂ × DsGRP57 ♀, DsGRP20 ♂ × DsGRP57 ♀, and DsGRP57 ♂ ×  
133 DsGRP20 ♀), mated status (non-mated/mated), density (5, 10 and 15 flies per vial) and their  
134 interactions were modelled as fixed factors and tested with F-statistics. For tests of fixed  
135 effects, we applied a Satterthwaite approximation to calculate the denominator degrees of  
136 freedom via the “ddfm=SAT” option in SAS. Vial was modelled as a random effect. Density  
137 was treated as a categorical factor as we did not necessarily expect linear relationships between  
138 density and longevity. Models were simplified by backward single term deletions ( $p \leq 0.05$ ).  
139 Significant interactions that included sex were explored by fitting the mixed model separately  
140 for each sex.

141

142 In our initial modelling, we used a four-level ‘genotype’ effect that includes the homozygous  
143 founder lines (DsGRP20 and DsGRP57) and both reciprocal F1 crosses between these lines.  
144 Subsequent contrasts between these four levels allowed us to test multiple genetic effects. First,  
145 we compared homozygous line differences to assess genetic differences in lifespan. Second,  
146 contrasts between the F1 and homozygous genotypes permitted a test for the effect of  
147 inbreeding. Third, contrasts between the two F1 crosses allowed us to test for a reciprocal cross  
148 effect that includes X chromosome genome influences. We present effect sizes as least square  
149 means and used Tukey’s HSD to correct for multiple testing.

150

## 151 Results

152 After censoring 194 flies that escaped while being transferred to fresh holding vials (<5% of  
153 total flies), 4606 flies were available for analysis. Across the entire experiment, female-biased  
154 longevity was apparent. While female *D. serrata* lived on average 54 days (range 4 – 104 days),  
155 males lived an average of only 34 days (range 4-69 days). The final simplified linear model  
156 describing genetic and environmental influences on lifespan variation appears in Table 1.  
157 While the model provided statistical support for sex differences in lifespan in *D. serrata* (*Sex*:  
158  $F_{1,454.4} = 1798.3, P = 4.54 \times 10^{-160}$ ), males and females were influenced differently by genotype (*Sex*  
159  $\times$  *Genotype*:  $F_{3,454.3} = 64.6, P = 8.36 \times 10^{-35}$ ), which was also a significant main effect in the model  
160 (*Genotype*:  $F_{3,601.3} = 340.4, P = 3.83 \times 10^{-129}$ ). Here, three key results are of interest. First, reciprocal  
161 crossing did not affect the degree of sexual dimorphism with no lifespan differences found  
162 between the males of F1 genotypes (20 ♂ x 57 ♀) and (57 ♂ x 20 ♀) or between the females of  
163 these two F1 genotypes (Fig. 1). Second, males and females were affected by outcrossing in  
164 different ways. F1 females lived at least 17 days longer than homozygous parental line females  
165 and a similar degree of increase (~ 40%) was observed in F1 males compared to parental line  
166 DsGRP20 males (Fig. 1). However, there was no difference in male lifespan between the F1s  
167 and parental line DsGRP57 (Fig. 1) consistent with a lack of any outcrossing effect. Third,  
168 genetic differences were also apparent between the two parental lines with both males and  
169 females from line DsGRP57 living between 14 and 7 days longer than males and females from  
170 line DsGRP20 respectively.

171

172 Our analysis also indicated a genotype-by-environment interaction for lifespan. Genotype  
173 dependent effects were observed for both density and mating via a significant three-way  
174 interaction (Table 1: *Genotype*  $\times$  *Density*  $\times$  *Mating*:  $F_{6,552.8} = 2.45, P = 0.024$ ). The social  
175 environmental effects underlying this significant interaction were, however, typically more  
176 subtle than the effects seen in the interaction between sex and genotype (Fig. 2) Considering  
177 this interaction further, post-hoc comparisons revealed significant differences between density  
178 and mating within only two of the four genotypes the parental (57 ♂ x 57 ♀) and the reciprocal  
179 F1 (20 ♂ x 57 ♀). For these genotypes, an effect of mating was detected but only in the low-  
180 density treatments, with the lifespan of mated flies on average, 6 days higher than unmated  
181 flies (Fig. 2).

182

183 **Discussion**

184

185 *Unguarded X and female-biased lifespan in D. serrata*

186

187 All treatment combinations female *D. serrata* lived longer than males, a result consistent with  
188 a wide range of wild and captive species, where on average, the homogametic sex lives longer  
189 than its heterogametic counterpart (Xirocostas et al., 2020). Our result is also consistent with  
190 two previous studies of *Drosophila serrata* both of which indicate female-biased longevity  
191 (Robson et al., 2006, Wit et al., 2015). One prominent hypothesis for reduced male lifespan is  
192 the “unguarded X” hypothesis (Trivers, 1985). This hypothesis predicts that reduced male  
193 lifespan is a result of the unconditional expression of recessive deleterious alleles on the single  
194 X chromosome. To date, the few studies that have explicitly tested predictions arising from the  
195 unguarded X hypothesis, conducted in *Drosophila melanogaster* (Carazo et al., 2016,  
196 Sultanova et al., 2018, Brengdahl et al., 2018a) have produced inconsistent results.

197

198 Here, we used two inbred lines with differing lifespans to create outbred and reciprocal F1’s to  
199 test for reduced lifespan in males as predicted by the unguarded X hypothesis. Despite  
200 differences in inbred parental lifespan, we found no differences in lifespan between the outbred  
201 and reciprocal male F1’s that could be attributed to the accumulation of recessive deleterious  
202 mutations on the X chromosome as predicted by the unguarded X hypothesis (Fig. 1). Under  
203 the unguarded X hypothesis, outbred male F1 offspring of the shorter-lived maternal line  
204 inherit deleterious mutations on their X chromosome, resulting in lower lifespan than offspring  
205 from the longer-lived maternal line without recessive deleterious mutations on the X  
206 chromosome. Although the effects of recessive deleterious mutations may be underestimated  
207 in crosses between highly inbred lines due to higher expected levels of purging during the  
208 inbreeding process (Hedrick, 1994), similar to studies in *D. melanogaster* (Brengdahl et al.,  
209 2018a), the unguarded X hypothesis appears to be insufficient to explain sexual dimorphism  
210 in *D. serrata* lifespan. Sex-specific differences in selection (Bonduriansky et al., 2008,  
211 Maklakov et al., 2009, Maklakov and Lummaa, 2013) could better explain the pattern of higher  
212 mortality in males and lifespan dimorphism observed in *D. serrata*. Alternative explanations  
213 that partly explain the patterns predicted by the unguarded X hypothesis and could be explored  
214 in future studies include sexually antagonistic genes and sex-specific expression patterns  
215 (Sultanova et al., 2018, Brengdahl et al., 2018a).



216

217 *Genotype-by-social environment interactions for lifespan*

218

219 In addition to sex- and genotype-biased longevity, we also found interactions of genotype with  
220 mating and density, our two experimentally manipulated axes of social background. Across a  
221 range of taxa, sexual dimorphism is a result of complex relationships between environmental  
222 conditions and sex-specific reproductive costs (Lemaitre et al., 2020). Mean lifespans did not  
223 differ significantly between density treatments within genotypes (Fig. 2), even though large  
224 sex and genotype effects were detected. While we detected no *Genotype*  $\times$  *Density* or *Sex*  $\times$   
225 *Density* interaction, there was a highly significant interaction between density and mating that  
226 appeared to be driven by a change in rank order lifespan between low and medium density,  
227 which was highest for low density in the mated treatment but lowest for the unmated treatment  
228 (Fig. 2). Survivorship experiments with high densities at the beginning can produce high  
229 mortality rates at young ages (Graves and Mueller, 1993), however we observed no such effect  
230 in our high density treatments.

231

232 In our study, mating had no effect on mean lifespan in *D. serrata*. While we did detect a  
233 significant *Genotype*  $\times$  *Mating* interaction this can be explained by idiosyncratic effects of  
234 genotype on mating and density (Fig 1). Adverse effects of multiple mating on lifespan in *D.*  
235 *melanogaster* males have been reported in several studies, as have toxic effects of male  
236 accessory gland proteins on female fitness and lifespan (Fowler and Partridge, 1989, Chapman  
237 et al., 1995). In female *D. serrata*, continued male courtship and harassment also leads to  
238 decreased fitness in females (Chenoweth et al., 2015). Intermittent and short-term mating, as  
239 was the case in this study, could explain why mated and unmated flies have similar lifespans,  
240 except at low density in two genotypes where unmated flies lived on average 6 days longer.  
241 Though widespread, trade-offs between longevity and reproduction are hardly ubiquitous, can  
242 be highly plastic, and uncoupled under certain environmental or genetic conditions (Flatt,  
243 2011).

244

245

## 246 *Conclusion*

247

248 Here, we show that the pattern of sexual dimorphism in *D. serrata* is consistent with females  
249 living longer than males across all genotypes and treatments. As expected, outbred genotypes  
250 lived longer, and female lifespan was more adversely affected by inbreeding. However outbred  
251 male lifespan for the outbred F1 genotypes did not differ as expected from a cross between  
252 parental genotypes with significantly different lifespans. Overall, our findings converge with  
253 existing evidence to suggest that sex-specific selection largely drives the sexual dimorphism  
254 seen in lifespan (Bonduriansky et al., 2008, Maklakov et al., 2009, Maklakov and Lummaa,  
255 2013), and that physiological differences resulting from strategies developed amongst sexes to  
256 maximize fitness can be independent of the effects of mating and/or density (Sultanova et al.,  
257 2020, Maklakov et al., 2017, Harvanek et al., 2017, Kimber and Chippindale, 2013, Ziehm et  
258 al., 2013, Vermeulen and Bijlsma, 2004a, Vermeulen and Bijlsma, 2004b). As the first study  
259 dissecting contributions of genetic background and social environment on lifespan in *D.*  
260 *serrata*, the robustness of these findings will no doubt be revealed by further testing effects on  
261 lifespan across different conditions. It is however reasonable to conclude that, based on a  
262 variety of studies across different taxa and *Drosophila* species, ageing in *D. serrata* is best  
263 viewed as a condition-dependent environmental modulation of a genetically determined trait.

264

## 265 **Acknowledgements**

266 We thank Nicholas Appleton for assistance with fly work.

## 267 **Competing interests**

268 The authors declare no competing financial interests.

269

## 270 **Author Contributions**

271 All authors contributed to the planning of the experiments; V.P.N performed the experiments and  
272 the other authors assisted in analyses, interpretation, and writing the manuscript. **Funding**

273 This research was supported with funding provided by the University of Queensland. V.P.N.  
274 was supported by the QUEX Institute - a joint initiative of The University of Queensland and  
275 the University of Exeter.

276 **References**

277

- 278 AIGAKI, T. & OHBA, S. 1984. Effect of mating status on *Drosophila virilis* lifespan.  
279 *Experimental Gerontology*, 19, 267-278.
- 280 AUSTAD, S. N. 2019. Sex differences in health and aging: a dialog between the brain and  
281 gonad? *Geroscience*, 41, 267-273.
- 282 BALLARD, J. W. O. 2005. *Drosophila simulans* as a novel model for studying  
283 mitochondrial metabolism and aging. *Experimental Gerontology*, 40, 763-773.
- 284 BONDURIANSKY, R., MAKLAKOV, A., ZAJITSCHKEK, F. & BROOKS, R. 2008. Sexual  
285 selection, sexual conflict and the evolution of ageing and life span. *Functional*  
286 *Ecology*, 22, 443-453.
- 287 BRENGDAHL, M., KIMBER, C. M., MAGUIRE-BAXTER, J. & FRIBERG, U. 2018a. Sex  
288 differences in life span: Females homozygous for the X chromosome do not suffer the  
289 shorter life span predicted by the unguarded X hypothesis. *Evolution*, 72, 568-577.
- 290 BRENGDAHL, M., KIMBER, C. M., MAGUIRE-BAXTER, J., MALACRINO, A. &  
291 FRIBERG, U. 2018b. Genetic Quality Affects the Rate of Male and Female  
292 Reproductive Aging Differently in *Drosophila melanogaster*. *Am Nat*, 192, 761-772.
- 293 BURGER, J. M. & PROMISLOW, D. E. 2004. Sex-specific effects of interventions that  
294 extend fly life span. *Sci Aging Knowledge Environ*, 2004, pe30.
- 295 CARAZO, P., GREEN, J., SEPIL, I., PIZZARI, T. & WIGBY, S. 2016. Inbreeding removes  
296 sex differences in lifespan in a population of *Drosophila melanogaster*. *Biol Lett*, 12.
- 297 CHAPMAN, T., LIDDLE, L. F., KALB, J. M., WOLFNER, M. F. & PARTRIDGE, L. 1995.  
298 Cost of mating in *Drosophila melanogaster* females is mediated by male accessory  
299 gland products. *Nature*, 373, 241-244.
- 300 CHENOWETH, S. F., APPLETON, N. C., ALLEN, S. L. & RUNDLE, H. D. 2015. Genomic  
301 Evidence that Sexual Selection Impedes Adaptation to a Novel Environment. *Curr*  
302 *Biol*, 25, 1860-6.
- 303 FLATT, T. 2011. Survival costs of reproduction in *Drosophila*. *Exp Gerontol*, 46, 369-75.
- 304 FOWLER, K. & PARTRIDGE, L. 1989. A cost of mating in female fruitflies. *Nature*, 338,  
305 760-761.
- 306 FRIBERG, U. 2005. Genetic variation in male and female reproductive characters associated  
307 with sexual conflict in *Drosophila melanogaster*. *Behav Genet*, 35, 455-62.
- 308 GRAVES, J. L., JR. & MUELLER, L. D. 1993. Population density effects on longevity.  
309 *Genetica*, 91, 99-109.
- 310 HARVANEK, Z. M., LYU, Y., GENDRON, C. M., JOHNSON, J. C., KONDO, S.,  
311 PROMISLOW, D. E. L. & PLETCHER, S. D. 2017. Perceptive costs of reproduction  
312 drive ageing and physiology in male *Drosophila*. *Nat Ecol Evol*, 1, 152.
- 313 HEDRICK, P. W. 1994. Purging inbreeding depression and the probability of extinction: full-  
314 sib mating. *Heredity (Edinb)*, 73 ( Pt 4), 363-72.
- 315 ILIADI, K. G., ILIADI, N. N. & BOULIANNE, G. L. 2009. Regulation of *Drosophila* life-  
316 span: effect of genetic background, sex, mating and social status. *Exp Gerontol*, 44,  
317 546-53.
- 318 JOSHI, A. & MUELLER, L. D. 1997. Adult crowding effects on longevity in *Drosophila*  
319 *melanogaster*: Increase in age-independent mortality. *Current Science*, 72, 255-260.
- 320 KHAZAELI, A. A., XIU, L. & CURTSINGER, J. W. 1995. Effect of adult cohort density on  
321 age-specific mortality in *Drosophila melanogaster*. *J Gerontol A Biol Sci Med Sci*, 50,  
322 B262-9.
- 323 KHAZAELI, A. A., XIU, L. & CURTSINGER, J. W. 1996. Effect of density on age-specific  
324 mortality in *Drosophila*: a density supplementation experiment. *Genetica*, 98, 21-31.

- 325 KIMBER, C. M. & CHIPPINDALE, A. K. 2013. Mutation, condition, and the maintenance  
326 of extended lifespan in *Drosophila*. *Curr Biol*, 23, 2283-2287.
- 327 KOLIADA, A., GAVRILYUK, K., BURDYLYUK, N., STRILBYTSKA, O., STOREY, K.  
328 B., KUHARSKII, V., LUSHCHAK, O. & VAISERMAN, A. 2020. Mating status  
329 affects *Drosophila* lifespan, metabolism and antioxidant system. *Comp Biochem*  
330 *Physiol A Mol Integr Physiol*, 246, 110716.
- 331 MAKLAKOV, A. A., BONDURIANSKY, R. & BROOKS, R. C. 2009. Sex differences,  
332 sexual selection, and ageing: an experimental evolution approach. *Evolution*, 63,  
333 2491-503.
- 334 MAKLAKOV, A. A., CARLSSON, H., DENBAUM, P., LIND, M. I., MAUTZ, B., HINAS,  
335 A. & IMMLER, S. 2017. Antagonistically pleiotropic allele increases lifespan and  
336 late-life reproduction at the cost of early-life reproduction and individual fitness. *Proc*  
337 *Biol Sci*, 284.
- 338 MAKLAKOV, A. A. & LUMMAA, V. 2013. Evolution of sex differences in lifespan and  
339 aging: causes and constraints. *Bioessays*, 35, 717-24.
- 340 MALICK, L. E. & KIDWELL, J. F. 1966. The effect of mating status, sex and genotype on  
341 longevity in *Drosophila melanogaster*. *Genetics*, 54, 203-9.
- 342 PIPER, M. D. W. & PARTRIDGE, L. 2018. *Drosophila* as a model for ageing. *Biochim*  
343 *Biophys Acta Mol Basis Dis*, 1864, 2707-2717.
- 344 REDDIE, A. J., ALLEN, S. L. & CHENOWETH, S. F. 2018. A Genomic Reference Panel  
345 for *Drosophila serrata*. *G3 (Bethesda)*, 8, 1335-1346.
- 346 ROBSON, S. K., VICKERS, M., BLOWS, M. W. & CROZIER, R. H. 2006. Age  
347 determination in individual wild-caught *Drosophila serrata* using pteridine  
348 concentration. *J Exp Biol*, 209, 3155-63.
- 349 ROGINA, B. 2011. For the special issue: aging studies in *Drosophila melanogaster*. *Exp*  
350 *Gerontol*, 46, 317-9.
- 351 SERVICE, P. M. 1989. The effect of mating status on lifespan, egg laying, and starvation  
352 resistance in *Drosophila melanogaster* in relation to selection on longevity. *Journal of*  
353 *Insect Physiology*, 35, 447-452.
- 354 SULTANOVA, Z., ANDIC, M. & CARAZO, P. 2018. The "unguarded-X" and the genetic  
355 architecture of lifespan: Inbreeding results in a potentially maladaptive sex-specific  
356 reduction of female lifespan in *Drosophila melanogaster*. *Evolution*, 72, 540-552.
- 357 SULTANOVA, Z. & CARAZO, P. 2019. Sex ratio at mating does not modulate age fitness  
358 effects in *Drosophila melanogaster*. *Ecol Evol*, 9, 6501-6507.
- 359 SULTANOVA, Z., GARCIA-ROA, R. & CARAZO, P. 2020. Condition dependent mortality  
360 exacerbates male (but not female) reproductive senescence and the potential for  
361 sexual conflict. *J Evol Biol*.
- 362 SWINDELL, W. R. & BOUZAT, J. L. 2006. Selection and inbreeding depression: effects of  
363 inbreeding rate and inbreeding environment. *Evolution*, 60, 1014-22.
- 364 TAN, C. K., PIZZARI, T. & WIGBY, S. 2013. Parental age, gametic age, and inbreeding  
365 interact to modulate offspring viability in *Drosophila melanogaster*. *Evolution*, 67,  
366 3043-51.
- 367 TRIVERS, R. 1985. *Social evolution*.
- 368 VAISERMAN, A. M., ZABUGA, O. G., KOLYADA, A. K., PISARUK, A. V. &  
369 KOZERETSKA, I. A. 2013. Reciprocal cross differences in *Drosophila melanogaster*  
370 longevity: an evidence for non-genomic effects in heterosis phenomenon?  
371 *Biogerontology*, 14, 153-63.
- 372 VERMEULEN, C. J. & BIJLSMA, R. 2004a. Changes in mortality patterns and temperature  
373 dependence of lifespan in *Drosophila melanogaster* caused by inbreeding. *Heredity*  
374 (*Edinb*), 92, 275-81.

- 375 VERMEULEN, C. J. & BIJLSMA, R. 2004b. Characterization of conditionally expressed  
376 mutants affecting age-specific survival in inbred lines of *Drosophila melanogaster*:  
377 lethal conditions and temperature-sensitive periods. *Genetics*, 167, 1241-8.
- 378 WIT, J., LOESCHCKE, V. & KELLERMANN, V. 2015. Life span variation in 13  
379 *Drosophila* species: a comparative study on life span, environmental variables and  
380 stress resistance. *J Evol Biol*, 28, 1892-900.
- 381 XIROCOSTAS, Z. A., EVERINGHAM, S. E. & MOLES, A. T. 2020. The sex with the  
382 reduced sex chromosome dies earlier: a comparison across the tree of life. *Biol Lett*,  
383 16, 20190867.
- 384 ZAJITSCHKEK, F., ZAJITSCHKEK, S. R., FRIBERG, U. & MAKLAKOV, A. A. 2013.  
385 Interactive effects of sex, social environment, dietary restriction, and methionine on  
386 survival and reproduction in fruit flies. *Age*, 35, 1193-1204.
- 387 ZIEHM, M., PIPER, M. D. & THORNTON, J. M. 2013. Analysing variation in *Drosophila*  
388 aging across independent experimental studies: a meta-analysis of survival data.  
389 *Aging Cell*, 12, 917-22.

390

391

392 **Figures**

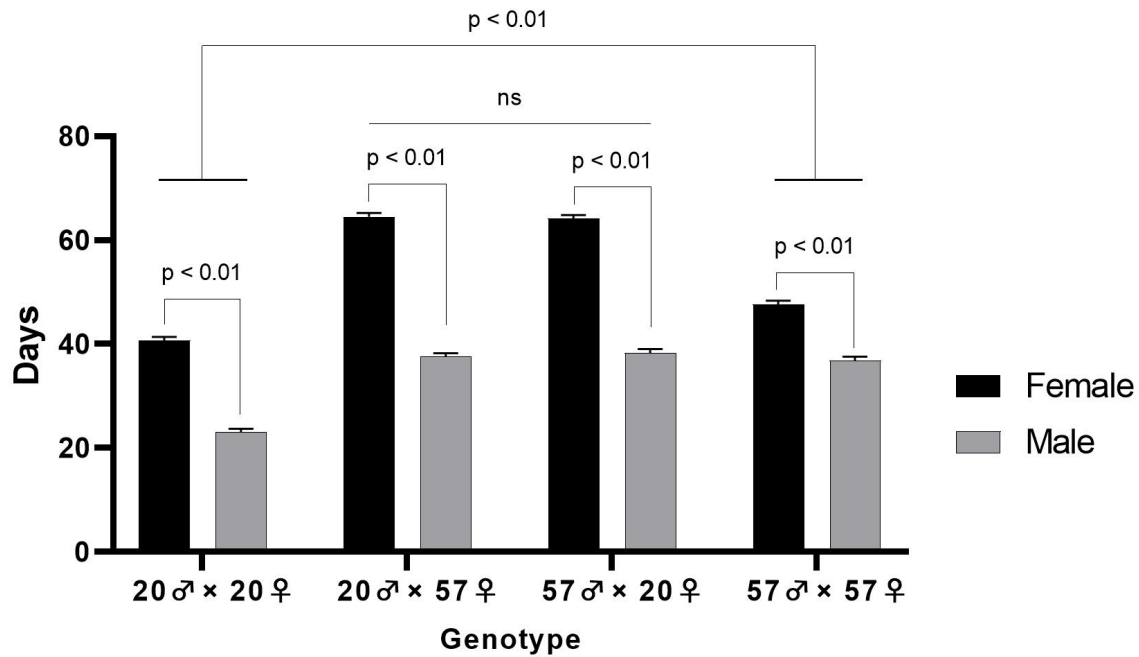

393

394 **Figure 1.** Genotype dependent effects on sex differences in lifespan in *D. serrata*. Sex  
395 differences in mean adult life span in the four genotypes resulting for our reciprocal cross  
396 between DsGRP20 and DsGRP57 (two parental lines plus alternate F1s). Bars represent the  
397 mean lifespan of each genotype pooled across the six density (low, medium, and high) × mating  
398 status (mated and non-mated) treatment combinations. Error bars represent 1 S. E.

399

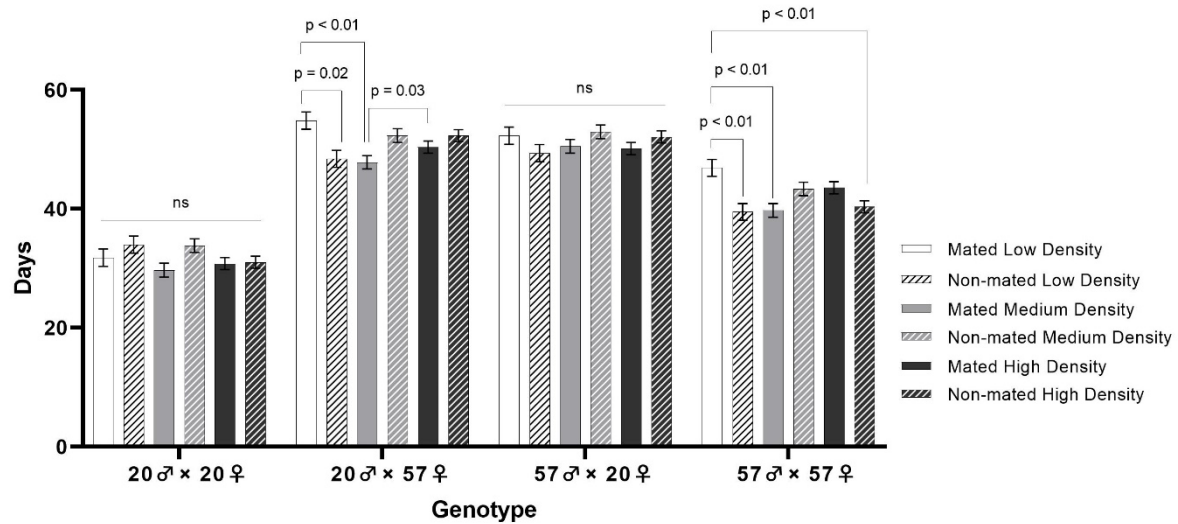

400

401

402 **Figure 2.** Genotype dependent effects of the social environment on lifespan in *D. serrata*.

403 Shown are pooled adult, male and female lifespan for the homozygous founder lines

404 *DsGRP20* ♂ x *DsGRP20* ♀ and *DsGRP57* ♂ x *DsGRP57* ♀, as well as both reciprocal F1

405 crosses *DsGRP20* ♂ x *DsGRP57* ♀ and *DsGRP57* ♂ x *DsGRP20* ♀ between these lines.

406 Each bar represents the mean of each genotype measured in one of six different density (low,

407 medium, and high) x mating status (mated and non-mated) treatment combinations Error bars

408 represent the 1 S.E. of the mean.

409



410 **Tables**

411 **Table 1. *F*-tests of fixed effects for the reduced model examining the significance of**  
412 **contributions of sex, genotype, mating, and density to *D. serrata* lifespan.**

413

| <b>Effect</b>                      | <b><i>d.f.</i></b> | <b><i>F</i></b> | <b><i>P</i></b>       |
|------------------------------------|--------------------|-----------------|-----------------------|
| <i>Sex</i>                         | 1, 454.4           | 1798.3          | 4.54e <sup>-160</sup> |
| <i>Genotype</i>                    | 3, 601.3           | 340.4           | 3.83e <sup>-129</sup> |
| <i>Sex × Genotype</i>              | 3, 454.3           | 64.6            | 8.36e <sup>-35</sup>  |
| <i>Density</i>                     | 2, 552.9           | 1.18            | 0.308                 |
| <i>Genotype × Density</i>          | 6, 552.7           | 0.84            | 0.539                 |
| <i>Mating</i>                      | 1, 601.5           | 0.09            | 0.764                 |
| <i>Genotype × Mating</i>           | 3, 601.3           | 3.28            | 0.021                 |
| <i>Density × Mating</i>            | 2, 552.9           | 15.0            | 4.53e <sup>-07</sup>  |
| <i>Genotype × Density × Mating</i> | 6, 552.8           | 2.45            | 0.024                 |

414
